# Supplementary material for: Recent Clinical Trials in Osteoporosis: A Firm Foundation or Falling Short?
Source: PLoS One. 2016 May 18;11(5):e0156068. doi: 10.1371/journal.pone.0156068 (PMC4871563; doi:10.1371/journal.pone.0156068)
Supplement: S4 Table — (DOCX) [file pone.0156068.s006.docx]

| **Characteristic** | **Osteoporosis studies (N=239)a** |
| --- | --- |
| **Lead sponsor classificationb** |  |
| Industry | 105/239 (43.9) |
| NIH | 3/239 (1.3) |
| U.S. federal government | 2/239 (0.8) |
| Other | 129/239 (54.0) |
| **One sponsor or collaborator** | 146/239 (61.1) |
| **Collaboratorsc** |  |
| Industry collaborator | 32/239 (13.4) |
| NIH collaborator | 12/239 (5.0) |
| U.S. federal gov’t collaborator | 1/239 (0.4) |
| Other collaborator | 53/239 (22.2) |
| **Lead sponsor or collaborators** |  |
| Industry lead or collaborator | 122/239 (51.0) |
| NIH lead or collaborator | 15/239 (6.3) |
| U.S. federal gov’t lead or collaborator | 3/239 (1.3) |
| Other lead or collaborator | 134/239 (56.1) |
| **Funding sourced** |  |
| Industry | 122/239 (51.0) |
| NIH | 15/239 (6.3) |
| Other | 102/239 (42.7) |
| **Funding source/number of centers classification** |  |
| Industry-funded single-center | 41/209 (19.6) |
| Industry-funded multi-center | 56/209 (26.8) |
| NIH-funded single-center | 13/209 (6.2) |
| NIH-funded multicenter | 1/209 (0.5) |
| Other-single-center | 84/209 (40.2) |
| Other-multicenter | 14/209 (6.7) |

Values are given as numerator/denominator (%).

aMissing values are excluded from denominators before calculating percentages.

bEach study has one lead sponsor.

cA study may have several collaborators.

dDerived from lead sponsor and collaborator fields using the “Derived funding source” algorithm described in Methods.
